# Supplementary material
Source: publisher site journal article supplement (https://www.dovepress.com/article/461581)
Supplement: Supplementary file 1 [file get_supplementary_file.php]

**Supplementary data**

**
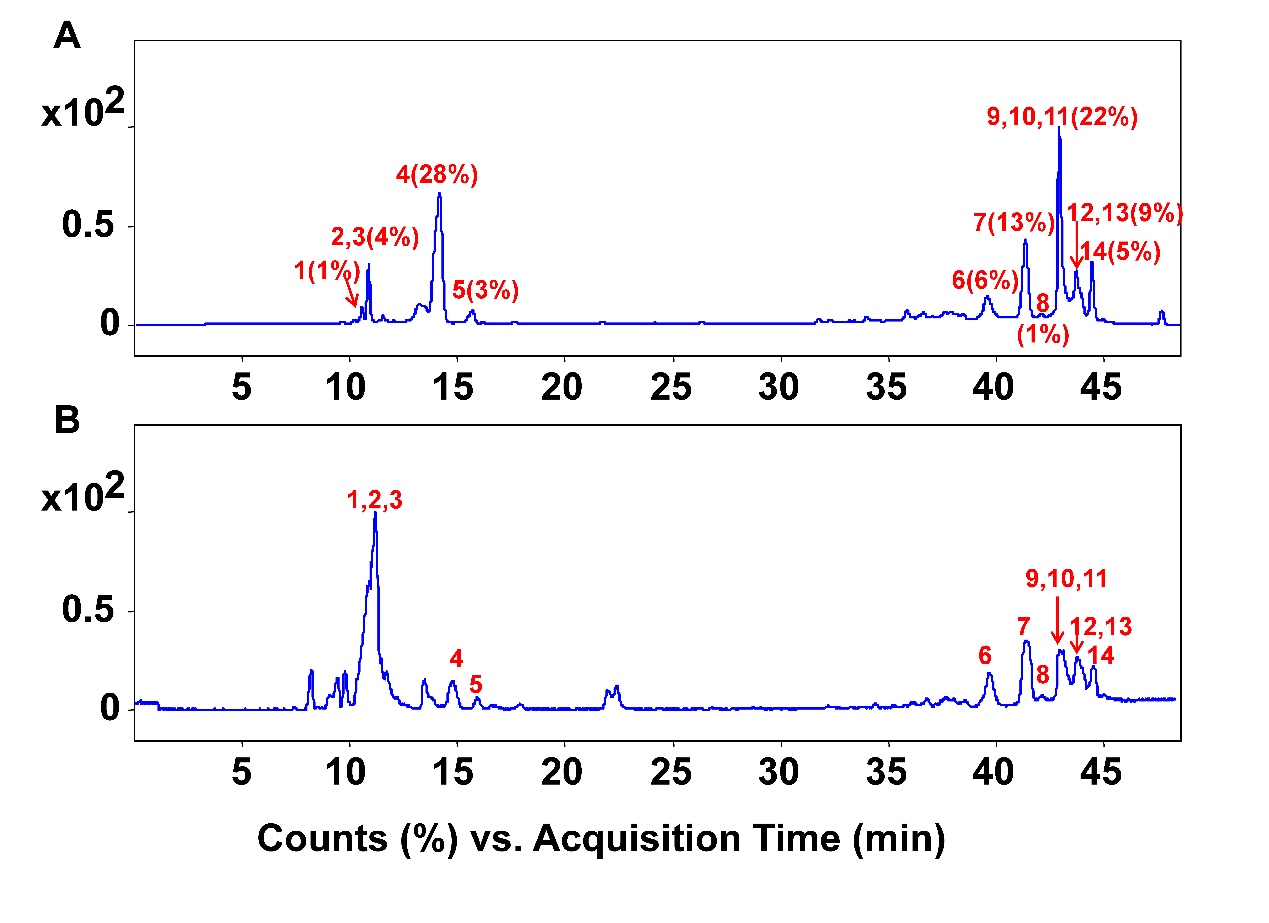
**

**Figure S1.** (A) UV chromatogram at 254 nm and (B) total ion chromatogram in negative mode of SCBPE. The sample was separated on an Ultimate XB-C18 column (4.6 mm × 250 mm, 5 µM). The mobile phase was 0.1% formic acid aqueous solution and methanol, and the gradient elution conditions were as follows: 0-30 min: 20% methanol; 30-31 min: 65%-80% methanol; 31-48 min: 80% methanol. The flow rate was set at 0.25 mL/min. (1) adenosine, (2) sucrose, (3) gluconic acid, (4) uridine, (5) guanosine, (6, 7, 9) caffeoyl-feruloylquinic acid or caffeoyl-isoferuloylquinic acid nitrogen-containing derivative, (8, 10, 12) caffeoyl-3′-methoxycinnamylquinic acid or caffeoyl-4′-methoxycinnamylquinic acid nitrogen-containing derivative, (11, 13, 14) *p* (or *m*)-coumaroyl-3′-methoxycinnamylquinic acid or *p* (or *m*)-coumaroyl-4′-methoxycinnamylquinic acid nitrogen-containing derivative.


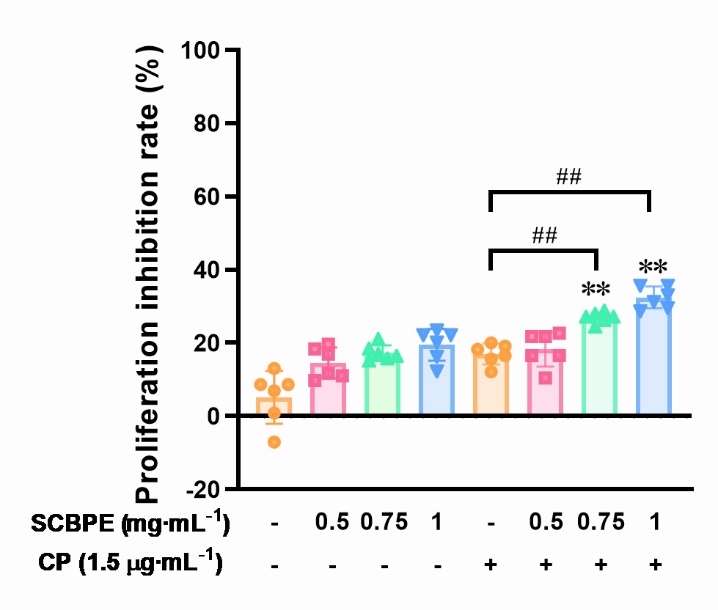


**Figure S2.** Effects of SCBPE in combination with CP on the proliferation of normal adult liver epithelial THLE-2 cells (n=6). Compared with the same concentration of SCBPE group, ** *p* < 0.01. Compared with the CP group, ## *p* < 0.01.

**Table S1.** The up-regulated proteins of SCBPE group compared with control group.

| **Protein accession** | **Protein description** | ***P* value** |
| --- | --- | --- |
| Q86YL5 | Testis development-related protein | 0.003644656 |
| P35542 | Serum amyloid A-4 protein | 0.000466689 |
| Q9Y5W9 | Sorting nexin-11 | 0.036446901 |
| Q8N4C6 | Ninein | 0.000309484 |
| Q86TP1 | Exopolyphosphatase PRUNE1 | 0.00872388 |
| P08631 | Tyrosine-protein kinase HCK | 0.000875586 |
| P05121 | Plasminogen activator inhibitor 1 | 0.001769687 |
| Q9UJF2 | Ras GTPase-activating protein nGAP | 0.008692437 |
| Q99735 | Microsomal glutathione S-transferase 2 | 0.012918134 |
| A6NDX5 | Putative zinc finger protein 840 | 1.74882E-07 |
| Q9UPY5 | Cystine/glutamate transporter | 1.31611E-05 |
| Q14186 | Transcription factor Dp-1 | 0.001133591 |
| Q6PCB5 | Lysine-specific demethylase RSBN1L | 4.39732E-06 |
| P0C221 | Coiled-coil domain-containing protein 175 | 0.000265053 |
| P04798 | Cytochrome P450 1A1 | 5.78025E-05 |
| Q96FN4 | Copine-2 | 0.000171479 |
| Q14117 | Dihydropyrimidinase | 0.001208248 |
| P08243 | Asparagine synthetase [glutamine-hydrolyzing] | 0.000227235 |
| P24390 | ER lumen protein-retaining receptor 1 | 0.001031627 |
| P02656 | Apolipoprotein C-III | 0.002262613 |
| Q86X52 | Chondroitin sulfate synthase 1 | 0.020869349 |
| O15431 | High affinity copper uptake protein 1 | 0.004064734 |
| Q02952 | A-kinase anchor protein 12 | 0.000129342 |
| P15407 | Fos-related antigen 1 | 0.000250295 |
| Q6AI12 | Ankyrin repeat domain-containing protein 40 | 0.004079412 |
| Q8N4N3 | Kelch-like protein 36 | 0.000136629 |
| Q8IWU2 | Serine/threonine-protein kinase LMTK2 | 0.001234986 |
| Q8TF40 | Folliculin-interacting protein 1 | 0.005208917 |
| Q9Y2I7 | 1-Phosphatidylinositol 3-phosphate 5-kinase | 0.000308621 |
| P57737 | Coronin-7 | 0.04606597 |
| Q7L9B9 | Endonuclease/exonuclease/phosphatase family domain-containing protein 1 | 0.013276051 |
| O60229 | Kalirin | 0.002098984 |
| P09601 | Heme oxygenase 1 | 5.37859E-05 |
| P17275 | Transcription factor jun-B | 0.046331285 |
| P19012 | Keratin, type I cytoskeletal 15 | 8.36617E-05 |
| P25208 | Nuclear transcription factor Y subunit beta | 0.00546824 |
| P48200 | Iron-responsive element-binding protein 2 | 0.001621132 |
| P19971 | Thymidine phosphorylase | 0.001927096 |
| P02795 | Metallothionein-2 | 0.008834622 |
| Q14728 | Major facilitator superfamily domain-containing protein 10 | 0.000794393 |
| Q9UEG4 | Zinc finger protein 629 | 0.043422216 |
| P35030 | Trypsin-3 | 3.45221E-06 |
| P78556 | C-C motif chemokine 20 | 5.83932E-05 |

**Table S2.** The down-regulated proteins of SCBPE group compared with control group.

| **Protein accession** | **Protein description** | ***P* value** |
| --- | --- | --- |
| P21980 | Protein-glutamine gamma-glutamyltransferase 2 | 5.15888E-05 |
| Q6DN03 | Putative histone H2B type 2-C | 0.000174779 |
| P54710 | Sodium/potassium-transporting ATPase subunit gamma | 0.004485852 |
| O75110 | Probable phospholipid-transporting ATPase IIA | 0.016253383 |
| P17405 | Sphingomyelin phosphodiesterase | 0.01490697 |
| P24385 | G1/S-specific cyclin-D1 | 0.02443952 |
| P41594 | Metabotropic glutamate receptor 5 | 0.019982836 |
| Q14116 | Interleukin-18 | 0.001674766 |
| Q8IWD4 | Coiled-coil domain-containing protein 117 | 0.01361842 |
| P02794 | Ferritin heavy chain | 3.09313E-05 |
| O60353 | Frizzled-6 | 0.049400174 |
| P02792 | Ferritin light chain | 0.00023302 |
| Q16625 | Occludin | 0.000940399 |
| P11169 | Solute carrier family 2, facilitated glucose transporter member 3 | 0.000133461 |
| Q14135 | Transcription cofactor vestigial-like protein 4 | 0.025249077 |
| Q9UK33 | Zinc finger protein 580 | 0.028542249 |
| Q01995 | Transgelin | 8.2192E-05 |
| Q9H6R7 | WD repeat and coiled-coil-containing protein | 0.006804845 |

**Table S3.** Differential proteins in focal adhesion pathway of SCBPE group compared with control group.

| **Protein accession** | **Protein description** | ***P* value** |
| --- | --- | --- |
| Q9Y490 | Talin-1 | 0.0248195 |
| O75369 | Filamin-B | 0.0009264 |
| Q14185 | Dedicator of cytokinesis protein 1 | 0.0269965 |
| O43707 | Alpha-actinin-4 | 0.0007031 |
| O75116 | Rho-associated protein kinase 2 | 0.0001463 |
| Q13177 | Serine/threonine-protein kinase PAK 2 | 0.0335032 |
| P63000 | Ras-related C3 botulinum toxin substrate 1 | 0.0033368 |
| P49841 | Glycogen synthase kinase-3 beta | 0.0281055 |
| P12814 | Alpha-actinin-1 | 0.0161851 |
| P21333 | Filamin-A | 0.0001603 |
| P28482 | Mitogen-activated protein kinase 1 | 0.0210829 |
| P18206 | Vinculin | 0.0007978 |
| O15230 | Laminin subunit alpha-5 | 0.0005863 |
| P61586 | Transforming protein RhoA | 0.0023396 |
| Q9NVD7 | Alpha-parvin | 0.0343254 |
| O14950 | Myosin regulatory light chain 12B | 0.0175853 |
| Q9NRY4 | Rho GTPase-activating protein 35 | 0.0026916 |
| Q92934 | Bcl2-associated agonist of cell death | 0.0421719 |
| P16144 | Integrin beta-4 | 0.038054 |
| P06756 | Integrin alpha-V | 0.0070587 |
| P56199 | Integrin alpha-1 | 0.0112165 |
| P02751 | Fibronectin | 0.0001812 |
